# Supplementary material for: Co-delivery of antigen and adjuvant by site-specific conjugation to dendritic cell-targeted Fab fragments potentiates T cell responses
Source: Royal Society of Chemistry journal article supplement (doi:10.1039/d5cb00014a), 2025-01-01
Supplement: d5cb00014a1.pdf [file d5cb00014a1.pdf]

## Supplemental information

### Synthesis TLR7/8a-PEG<sub>5k</sub>-DBCO:

#### General considerations:

DBCO-PEG<sub>5</sub>-NHS was obtained from Click Chemistry Tools (Newark, USA) and 1-(4-(Aminomethyl)benzyl)-2-butyl-1H-imidazo[4,5-c]quinolin-4-amine dihydrochloride was obtained from MedChemExpress (Monmouth Junction, USA). Solvents were purchased from Merck Milipore (Darmstadt, Germany), and were used as received. Analytic LC/MS was performed using a hybrid Thermo Finnigan/Shimadzu system equipped with a Phenomenex Gemini NX C18 column (3  $\mu$ m, 110 Å, 150 mmL x 2.0 mmD) using mobile phases A: 1% aq. HCOOH, B: 1% HCOOH in MeCN, 5-100% B/A gradient, 45 min with a flow of 0.2 mL/min with detection at 210 – 600 nm by a photo diode array (PDA), coupled to a LCQ fleet mass spectrometer (Thermo Finnigan ESI ion-trap) (LRMS). Peaks were manually integrated using MestreNova Software. High resolution mass spectrometry (HRMS) (ESI-TOF) was recorded on a AccuTOF CS JMS-T100CS mass spectrometer (JEOL), equipped with an electrospray ion source in positive mode (source voltage 2.4 kV, capillary temperature 250 °C) with resolution  $R = 7000$  (mass range = 10 – 10 000). Preparative HPLC was performed using a Shimadzu system equipped with a Phenomenex Gemini NX-C18 column (5  $\mu$ m, 110 Å, 150 mmL x 21.2 mmD) in combination with mobile phases A: 50 mM aq. NH<sub>4</sub>HCO<sub>3</sub>, B: MeCN, with detection at 215/254 nm. A gradient of 5-80% B/A was used, in 40 min with a flow of 6 mL/min. <sup>1</sup>H NMR and <sup>13</sup>C NMR spectra were recorded on a Bruker Avance III 500 (11.7 T) spectrometer. Chemical shifts ( $\delta$ ) are reported in ppm relative to tetramethylsilane as internal standard or the residual signal of the deuterated solvent was used as reference point. Coupling constants ( $J$ ) are given in Hz. All <sup>13</sup>C APT experiments were proton decoupled.

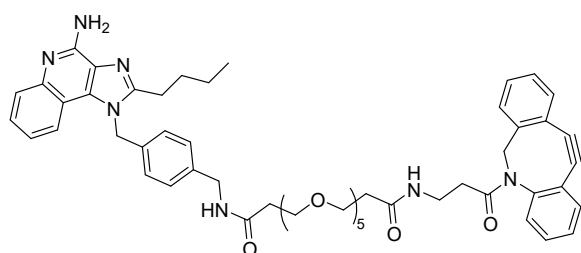

**TLR-7/8a-PEG<sub>5k</sub>-DBCO.** A round-bottom flask was charged with 1-(4-(Aminomethyl)benzyl)-2-butyl-1H-imidazo[4,5-c]quinolin-4-amine dihydrochloride (9.1 mg, 20.95  $\mu$ mol, 1 eq), equipped with a stirring bar and flushed with Ar. Dry DMF (500  $\mu$ L) was added and the solution was stirred. Et<sub>3</sub>N (7.3  $\mu$ L, 52.38  $\mu$ mol, 2.5 eq) was added to the stirring solution. Meanwhile, DBCO-

PEG<sub>5</sub>-NHS (12.7 mg, 18.31  $\mu$ mol, 0.9 eq) was dissolved in dry DMF (500  $\mu$ L) and the resulting solution was added to the stirring mixture. The mixture stirred at RT under Ar overnight, after which it was diluted with 50 mM NH<sub>4</sub>HCO<sub>3</sub> aq. sol. (1 mL) and MeOH (1 mL). The mixture was purified by reversed phase preparative basic HPLC (Rt: 29 min). Lyophilization resulted in the title compound as a colourless oil (6.05 mg, 6.44  $\mu$ mol, 31%). <sup>1</sup>H NMR (500 MHz, DMSO)  $\delta$  8.29 (t,  $J = 6.0$  Hz, 1H), 7.77 (d,  $J = 8.2$  Hz, 1H), 7.67 (t,  $J = 5.7$  Hz, 1H), 7.62 (d,  $J = 7.4$  Hz, 1H), 7.57 (td,  $J = 6.7, 2.9$  Hz, 2H), 7.52 – 7.42 (m, 3H), 7.42 – 7.27 (m, 5H), 7.18 (d,  $J = 7.9$  Hz, 3H), 7.03 (t,  $J = 7.3$  Hz, 1H), 6.96 (d,  $J = 7.9$  Hz, 3H), 6.56 (s, 2H), 5.83 (s, 3H), 5.03 (d,  $J = 14.1$  Hz, 1H), 4.21 (d,  $J = 5.9$  Hz, 3H), 3.67 – 3.55 (m, 4H), 3.52 – 3.37 (m, 15H), 3.15 – 3.05 (m, 1H), 2.97 – 2.84 (m, 4H), 2.33 (t,  $J = 6.3$  Hz, 3H), 2.16 (t,  $J = 6.5$  Hz, 2H), 1.80 (ddd,  $J = 15.9, 8.4, 5.7$  Hz, 1H), 1.70 (p,  $J = 7.6$  Hz, 3H), 1.37 (h,  $J = 7.4$  Hz, 3H), 1.23 (s, 1H), 0.86 (t,  $J = 7.4$  Hz, 3H). <sup>13</sup>C NMR (126 MHz, DMSO)  $\delta$  170.61, 170.34, 139.21, 135.46, 130.01, 128.68, 128.52, 128.19, 128.06, 127.27, 126.87, 125.86, 125.67, 122.92, 120.55, 70.19, 70.11, 69.96, 69.90, 67.29, 67.13, 55.29, 42.00, 36.57, 36.40, 35.40, 34.63, 30.02, 26.68, 22.31, 14.16. HPLC: Rt. 18.62 min. UV purity: >95%. LRMS (ESI+)  $m/z$  calc. for C<sub>54</sub>H<sub>64</sub>N<sub>7</sub>O<sub>8</sub> [M+H]<sup>+</sup> = 938.47, found 938.74. HRMS (ESI+)  $m/z$  calc. for C<sub>54</sub>H<sub>64</sub>N<sub>7</sub>O<sub>8</sub> [M+H]<sup>+</sup> = 938.4811, found 938.4792.

## Supplementary figures

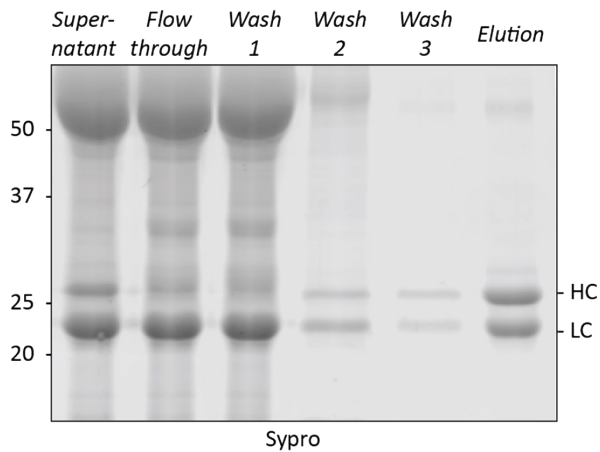

**Supplemental figure 1 | Ni-NTA Isolation anti-DEC205 Fab-srt-His.** The anti-DEC205 Fab fragment equipped with sortase-recognition motif and His-tag was isolated in high yield (70 mg Fab fragment) using Ni-NTA-His tag affinity isolation. The purity was determined by reducing 12% SDS-PAGE analysis and was determined to be >95%.

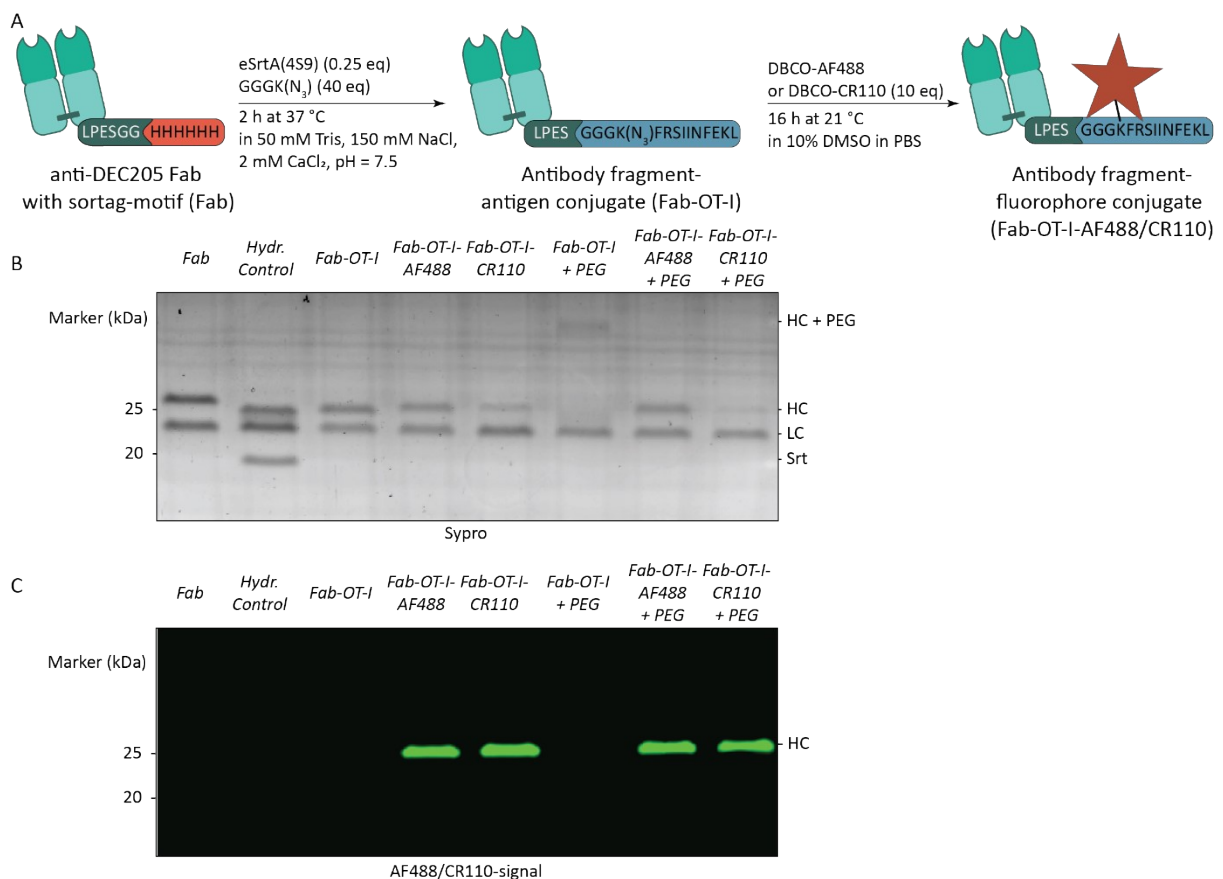

**Supplemental figure 2 | Characterization of fluorescently labeled Fab-antigen conjugates.** A) Schematic overview of reaction conditions to obtain AlexaFluor-488 and carboxyrhodamine-110 labeled conjugates (Fab-OT-I-AF488/CR110). B) Reducing SDS-PAGE (12%) analysis of Fab-OT-I-AF488 and Fab-OT-I-CR110. Analytical click reaction with DBCO-PEG<sub>5k</sub> demonstrates availability azide in lane 6 by a mass shift corresponding to attachment of the PEG<sub>5k</sub>, whereas in lane 7 and lane 8 no shift is observed as the azide is consumed by the DBCO-adjutant. C) Fluorescent reducing SDS-PAGE (12%) analysis of Fab-OT-I-AF488 and Fab-OT-I-CR110. A fluorescent signal is observed on the heavy chains of the Fab fragments at the expected molecular height of 25 kDa, indicating product formation.

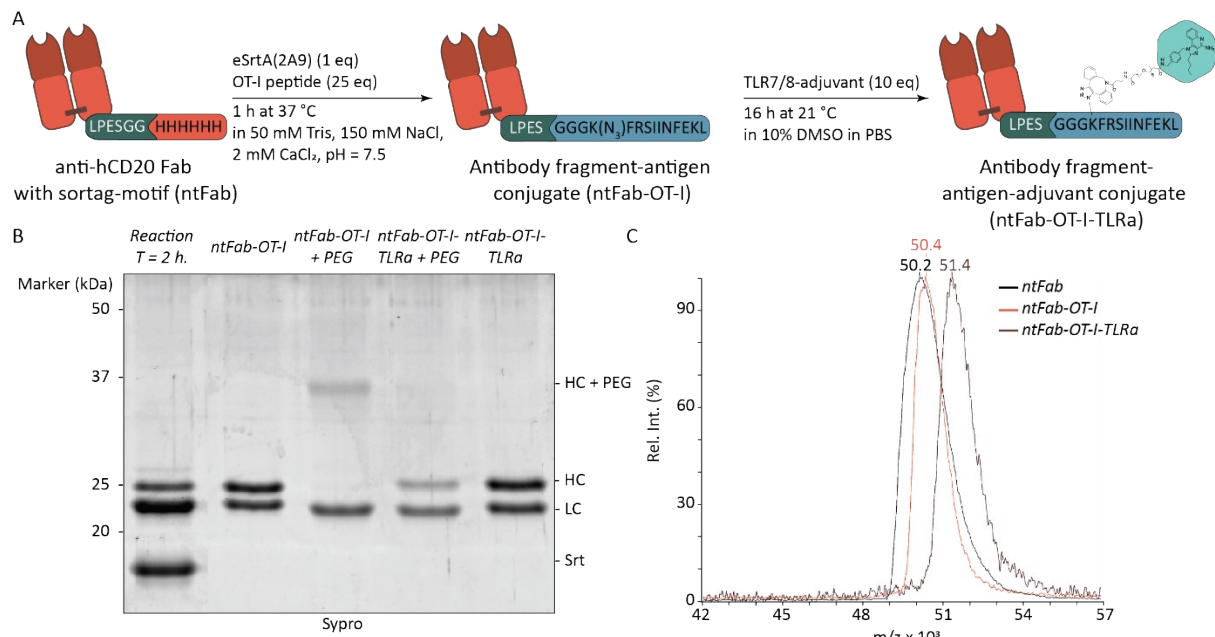

**Supplemental figure 3 | Characterization of non-targeted (anti-hCD20) AAA-conjugate.** A) Schematic overview of reaction conditions to obtain AAA-conjugate (ntFab-OT-I-TLRa). B) Reducing SDS-PAGE (12%) analysis of ntFab-OT-I-TLRa. Analytical click reaction with DBCO-PEG<sub>5k</sub> demonstrates availability azide in lane 3 by a mass shift corresponding to attachment of the PEG<sub>5k</sub>, whereas in lane 5 no shift is observed as the azide is consumed by the DBCO-adjuvant. C) MALDI-TOF analysis of Fab fragments. Mass shifts correspond to removal of His-tag and attachment of antigen and adjuvant respectively.

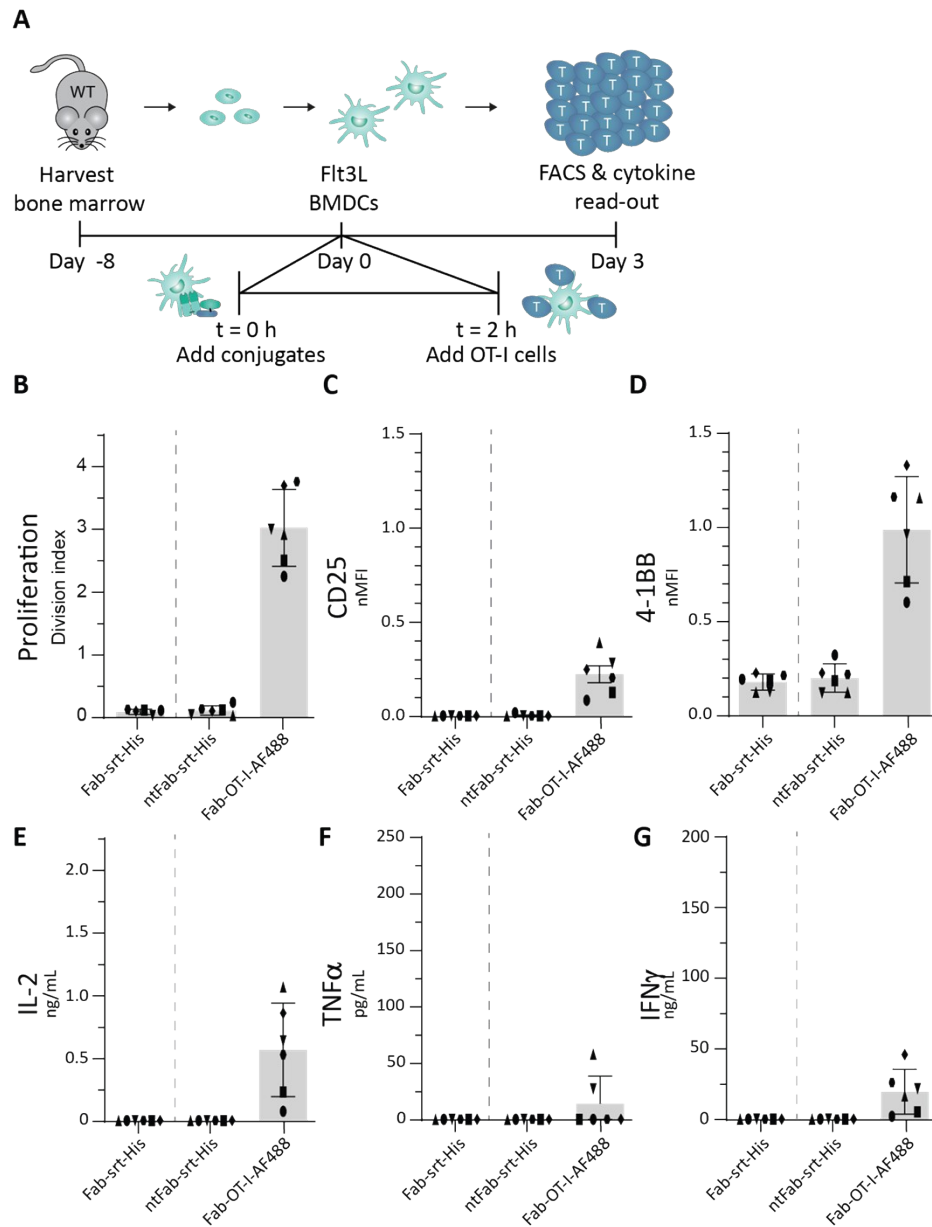

**Supplemental figure 4 | Ex vivo analysis of Fab-srt-His, ntFab-srt-His and Fab-OT-I-AF488.** A) Schematic overview of *ex vivo* T cell activation assay. In short, Flt3L-BMDCs were generated and pulsed for 2 h with 10 nM conjugate. Sequentially, the BMDCs were washed and a co-culture of BMDCs and OT-I cells (1:5 ratio) was set-up. After 3 days, OT-I cells were analyzed using FACS and cytokines in the supernatant were assessed via ELISA. B-D) Flow cytometry analysis of OT-I cells. Data (n = 6, technical duplicates) are depicted as division index (B) and as mean fluorescence intensity normalized to positive control  $\pm$ SD for CD25 (C) and 4-1BB (D). E-G) ELISA analysis (n = 6, technical duplicates) of IL-2 (E), TNF $\alpha$  (F), and IFN $\gamma$  (G). Data is depicted as mean  $\pm$ SD.

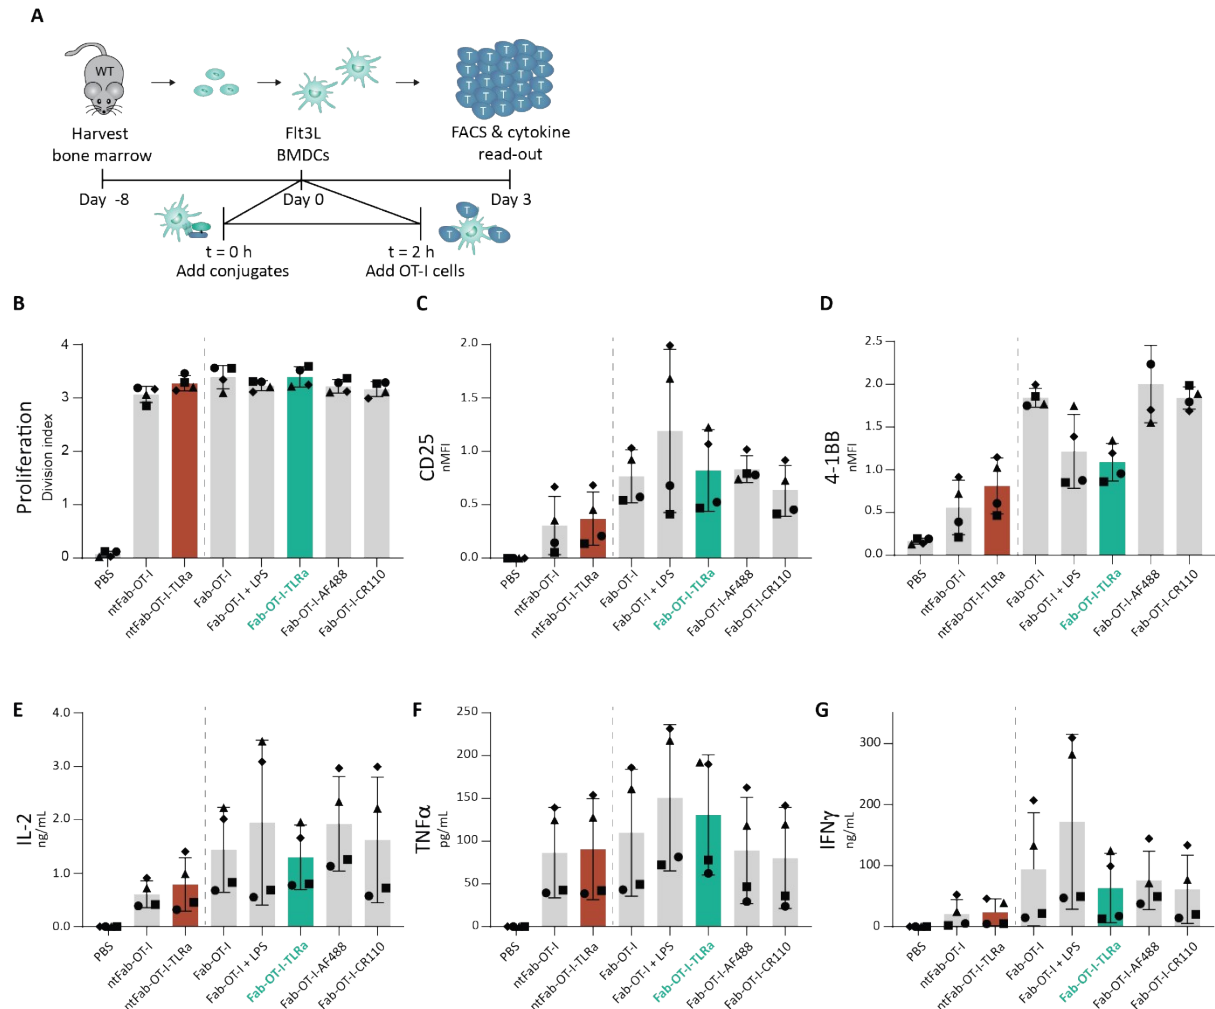

**Supplemental figure 5| Ex vivo analysis of AAA-conjugates at higher concentration (100 nM) masks beneficial effects of antigen-adjutant co-delivery.** A) Schematic overview of *ex vivo* T cell activation assay. In short, Flt3L-BMDCs were generated and pulsed for 2 h with 100 nM conjugate. Sequentially, the BMDCs were washed and a co-culture of BMDCs and OT-I cells (1:5 ratio) was set-up. After 3 days, OT-I cells were analyzed using FACS and cytokines in the supernatant were assessed via ELISA. B-D) Flow cytometry analysis of OT-I cells. Data (n = 4, technical duplicates) are depicted as division index (B) and as mean fluorescence intensity normalized to positive control  $\pm$ SD for CD25 (C) and 4-1BB (D). E-G) ELISA analysis (n = 4, technical duplicates) of IL-2 (E), TNF $\alpha$  (F), and IFN $\gamma$  (G). Data is depicted as mean  $\pm$ SD.

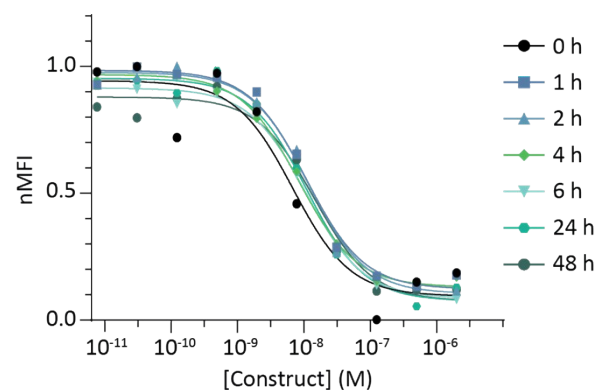

**Supplemental figure 6| Serum stability of AAA-conjugate.** The AAA-conjugate was incubated in 50% mouse serum in PBS for up to 48 h at 37 °C. Afterwards, a competitive binding assay using DEC205-expressing JAWS II cells was performed and no indication of majorly reduced binding capacity was observed for the conjugates incubated in serum.

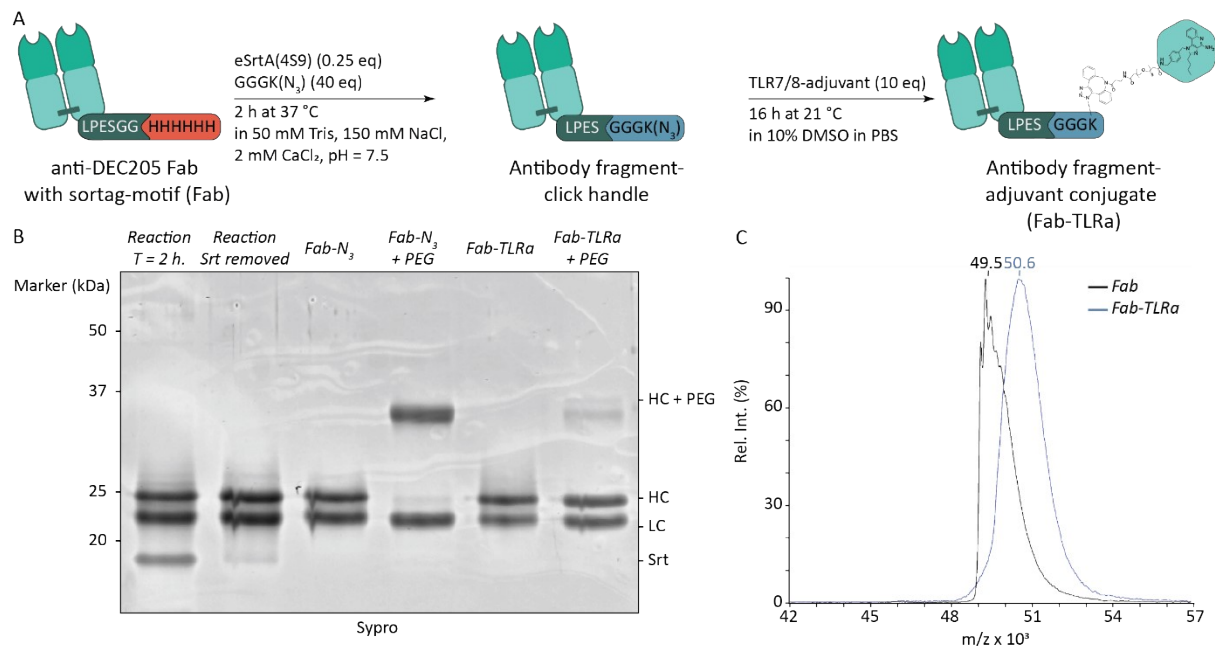

**Supplemental figure 7 | Characterization of targeted adjuvant conjugate.** A) Schematic overview of reaction conditions to obtain targeted adjuvant conjugate (Fab-TLRa). B) Reducing SDS-PAGE (12%) analysis of Fab-TLRa. Analytical click reaction with DBCO-PEG<sub>5k</sub> demonstrates availability azide in lane 4 by a mass shift corresponding to attachment of the PEG<sub>5k</sub>, whereas in lane 6 no shift (<5%) is observed as the azide is consumed by the DBCO-adjuvant. C) MALDI-TOF analysis of Fab fragments. Mass shifts correspond to removal of His-tag and attachment of adjuvant.

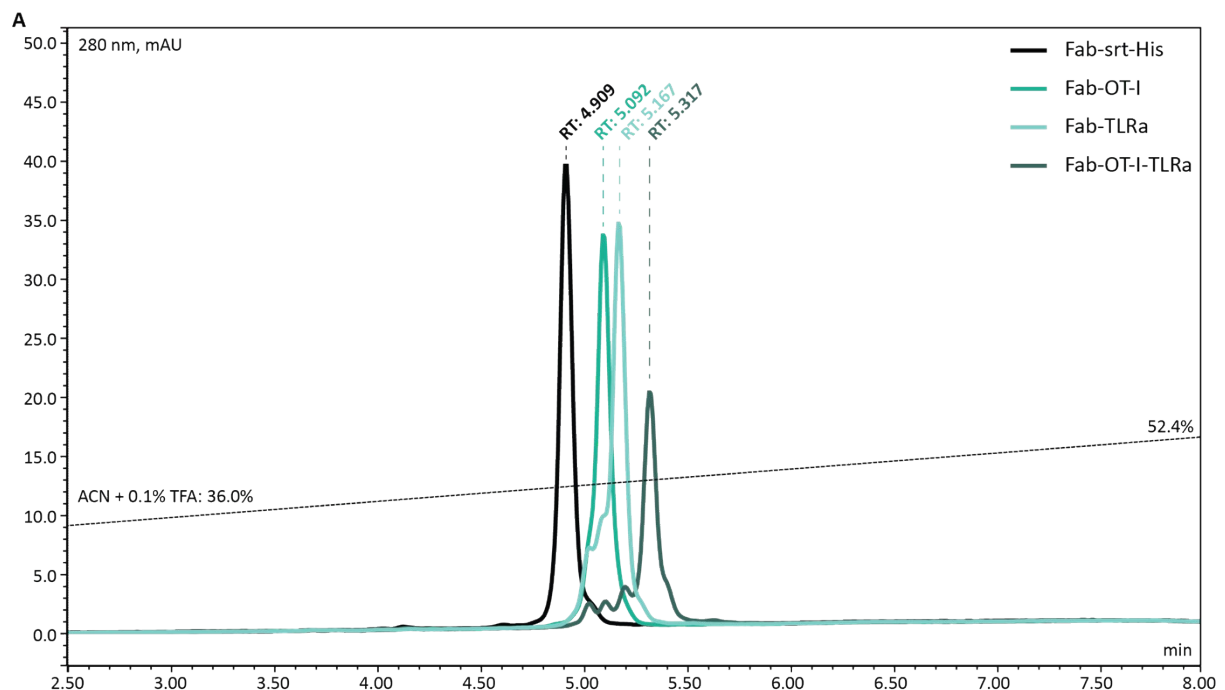

**Supplemental figure 8 | RP-HPLC analysis of conjugates.** A) RP-HPLC analysis (280 nm) of Fab-srt-His (retention time = 4.909 min), Fab-OT-I (retention time = 5.092 min), Fab-TLRa (retention time = 5.167 min), and Fab-OT-I-TLRa (retention time = 5.317 min). The dotted line depicts the gradient used during the analysis.

## Supplemental tables

**Supplemental Table 1 | Sequence of 459 HDR-template**

|                                                  |                                                                                                                                                                                                                                                                                                                                                                                                                                                                                                                                                                                                                                                         |
|--------------------------------------------------|---------------------------------------------------------------------------------------------------------------------------------------------------------------------------------------------------------------------------------------------------------------------------------------------------------------------------------------------------------------------------------------------------------------------------------------------------------------------------------------------------------------------------------------------------------------------------------------------------------------------------------------------------------|
| 5' Homology arm                                  | CCTGGAAGCTCTGGAGCCCTGTCCAGCGGTGTGCACACCTTCCCAGCTGTCTGCAGTCTGGAC<br>TCTACACTCTCACCAGCTCAGTGACTGTACCCTCCAGCACCTGGTCCAGCCAGGCCGTACCT<br>GCAACGTAGCCACCCGGCCAGCAGCACCAAGGTGGACAAGAAAATTGGTGAGAGAACAAC<br>CAGGGGATGAGGGGCTCACTAGAGGTGAGGATAAGGCATTAGATTGCCTACACCAACCAGG<br>GTGGGCAGACATCACCAGGGAGGGGGCTCAGCCAGGAGACCAAAAATTCTCTTTGTCTC<br>CCTTCTGGAGATTTCTATGTCTTTACACCCATTTATTAATATTCTGGGTAAGATGCCCTTGCA<br>TCATGACATACAGAGGCAGACTAGAGTATCAACCTGCAAAAGGTCATACCCAGGAAGAGCCT<br>GCCATGATCCACACCAGAACCAACCTGGGGCCTTCTACCTATAGACCATACTAACACACAG<br>CCTTCTCTCTGCA                                                                                                |
| Hinge region + GGGS-<br>linker + Sortag + Histag | GTGCCAAGGAATGCGGAGGCGGAGGCAGCCTGCCGGAATCCGGCGGCCACCATCACCATC<br>ACCATTGA                                                                                                                                                                                                                                                                                                                                                                                                                                                                                                                                                                                |
| Internal ribosome<br>entry site (IRES)           | GGATCCCAATTGCTCGAGGCCCTCTCCCTCCCCCCCCCTAACGTTACTGGCCGAAGCCGCT<br>TGGAATAAGGCCGGTGTGCGTTTGTCTATATGTTATTTCCACCATTGCGCTCTTTGGCAA<br>TGTGAGGGCCCGAAACCTGGCCCTGTCTTCTTGACGAGCATTCTAGGGGTCTTTCCCTCT<br>CGCCAAAGGAATGCAAGGTCTGTTGAATGTCGTGAAGGAAGCAGTTCCTCTGGAAGCTTCT<br>GAAGACAAACAACGTCTGTAGCGACCTTTGCAGGCAGCGGAACCCCCACCTGGCGACAG<br>GTGCCTCTGCGGCCAAAAGCCACGTGTATAAGATACACCTGCAAAGGCGGCACAACCCAGT<br>GCCACGTTGTGAGTTGGATAGTTGTGGAAGAGTCAAATGGCTCTCTCAAGCGTATTCAAC<br>AAGGGGCTGAAGGATGCCAGAAGGTACCCCATTTGTATGGGATCTGATCTGGGGCCTCGGT<br>GCACATGCTTTACATGTGTTTAGTCGAGGTAAAAAACGTCTAGGCCCCCGAACCCAGGGG<br>ACGTGGTTTTCTTTGAAAAACACGATGATAATATGGCCACAGAATTGCCACC |
| blasticidin resistance                           | ATGGCCAAGCCTTTGTCTCAAGAAGAATCCACCCTCATTGAAAAGAGCAACGGCTACAATCAA<br>CAGCATCCCCATCTCTGAAGACTACAGCGTCGCCAGCGCAGCTCTCTAGCGACGGCCGCA<br>TCTTCACTGGTGTCAATGTATATCATTTTACTGGGGGACCTTGTGCAGAACTCGTGGTGTGG<br>GCACTGCTGCTGCTGCGGCAGCTGGCAACCTGACTTGTATCGTCGCGATCGGAAATGAGAAC<br>AGGGGCATCTTGAGCCCTGCGGACGGTGCCGACAGGTGCTTCTCGATCTGCATCCTGGGAT<br>CAAAGCCATAGTGAAGGACAGTGTGGACAGCCGACGGCAGTTGGGATTCTGTAATTGCTG<br>CCCTCTGTTATGTGTGGGAGGGCTAAG                                                                                                                                                                                                                     |
| Poly(A)-tail                                     | TACTAGTCGACTGTGCCTTCTAGTTGCCAGCCATCTGTTGTTGCCCTCCCCCTGCCTTCT<br>TGACCCTGGAAGGTGCCACTCCCCTGTCCTTTCTTAATAAAATGAGGAAATTGCATCGCATT<br>GTCTGAGTAGGTGTCACTTATTCTGGGGGGTGGGGTGGGGCAGGACAGCAAGGGGGAGG<br>ATTGGGAAGACAATAGCAGGCATGCTGGGGATGCGGTGGGCTCTATGGAGATCTTTAATTA<br>AGGT                                                                                                                                                                                                                                                                                                                                                                                  |
| 3' Homology arm                                  | AAGTCACTAGGACTATTACTCCAGCCCCAGATTCAAAAAATATCCTCAGAGGCCCATGTTAGA<br>GGATGACACAGCTATTGACCTATTCTACCTTTCTTCTCATCTACAGGCTCAGAAGTATCATC<br>TGTCTTCATCTTCCCCCAAAGACCAAGATGTGCTCACCATCACTCTGACTCCTAAGGTCACG<br>TGTGTTGTGGTAGACATTAGCCAGAATGATCCCGAGGTCCGGTTCAGCTGGTTTATAGATGA<br>CGTGGAAGTCCACACAGCTCAGACTCATGCCCGGAGAAGCAGTCCAACAGCACTTTACGCT<br>CAGTCAGTGAACCTCCCATCGTGACCGGGACTGGCTCAATGGCAAGACGTTCAAATGCAAA<br>GTCAACAGTGGAGATTCCCTGCCCCATCGAGAAAAGCATCTCAAACCCGAAGGTGGGA<br>GCAGCAGGGTGTGTGGTGTAGAAGCTGCAGTAGGCCATAGACAGAGCTTGACTTAAGTAGA<br>CTT                                                                                                           |

**Supplemental table 2 | Endotoxin results**

| <i>Conjugate</i> | <i>Endotoxin<br/>levels (EU/mL)</i> |
|------------------|-------------------------------------|
| Fab              | <0.01                               |
| Fab-OT-I         | <0.02                               |
| Fab-OT-I-TLRa    | <0.02                               |
| Fab-OT-I-AF488   | <0.02                               |
| Fab-OT-I-CR110   | <0.03                               |
| ntFab            | <0.01                               |
| ntFab-OT-I       | <0.01                               |
| ntFab-OT-I-TLRa  | <0.01                               |
| Fab-TLRa         | <0.01                               |
| ntFab-TLRa       | <0.01                               |
